# Supplementary material for: Strain-Driven Oxygen Vacancy Ordering in LaNiO3 Thin Films: Impact of Ruddlesden-Popper Faults
Source: Research Square preprint supplement (doi:10.21203/rs.3.rs-5883878/v1), 2025-02-06
Supplement: Supplementary file 1 [file 1c786a9f83a308d14df7ab75.docx]

**Strain-Driven Oxygen Vacancy Ordering in LaNiO3 Thin Films: Impact of Ruddlesden-Popper Faults**

Pritam Banerjee1,2*, Pasquale Orgiani1*, Arno Meingast3, Sorin Lazar3, Peter V. Sushko4, Steven R. Spurgeon5,6, Regina Ciancio7, 1*

1 CNR-IOM Istituto Officina dei Materiali, 34139 Trieste, Italy.

2 National Centre for Nano Fabrication and Characterization (DTU Nanolab), Technical University of Denmark, Fysikvej 307, 2800 Kongens Lyngby, Denmark.

3 Thermo Fisher Scientific, Achtseweg Noord 5, 5651 GG Eindhoven, The Netherlands.

4 Physical and Computational Sciences Directorate, Pacific Northwest National Laboratory, Richland, WA, 99354, USA.

5 National Renewable Energy Laboratory, Golden, CO, 80401 USA.

6 University of Colorado Boulder, Boulder, CO 80309 USA.

7 AREA Science Park, 34149 Trieste, Italy

* Corresponding authors: pritam.nitjsr@gmail.com, [regina.ciancio@areasciencepark.it](mailto:regina.ciancio@areasciencepark.it) and orgiani@iom.cnr.it

*
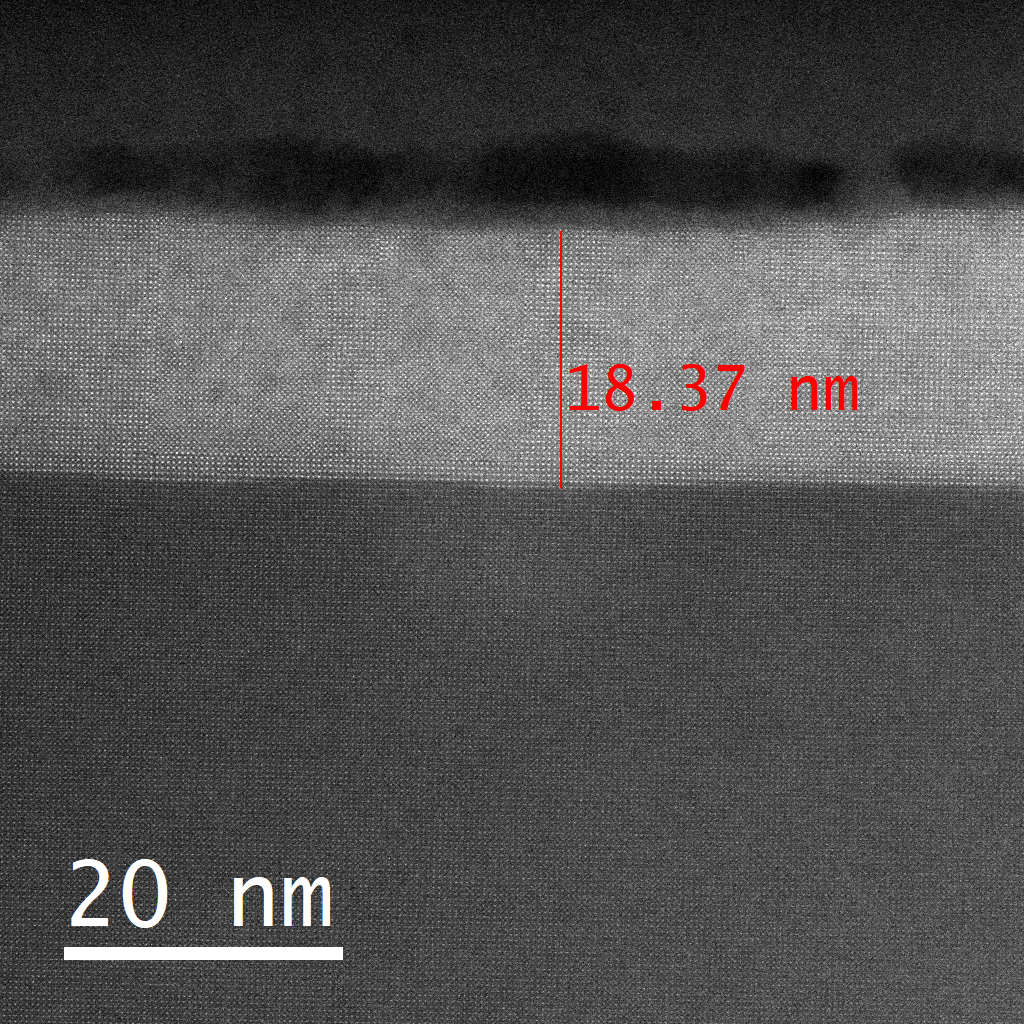
*

*Fig. S1 HAADF STEM image of LNO film grown on the STO(001) substrate, with a film thickness of around 18 nm.*


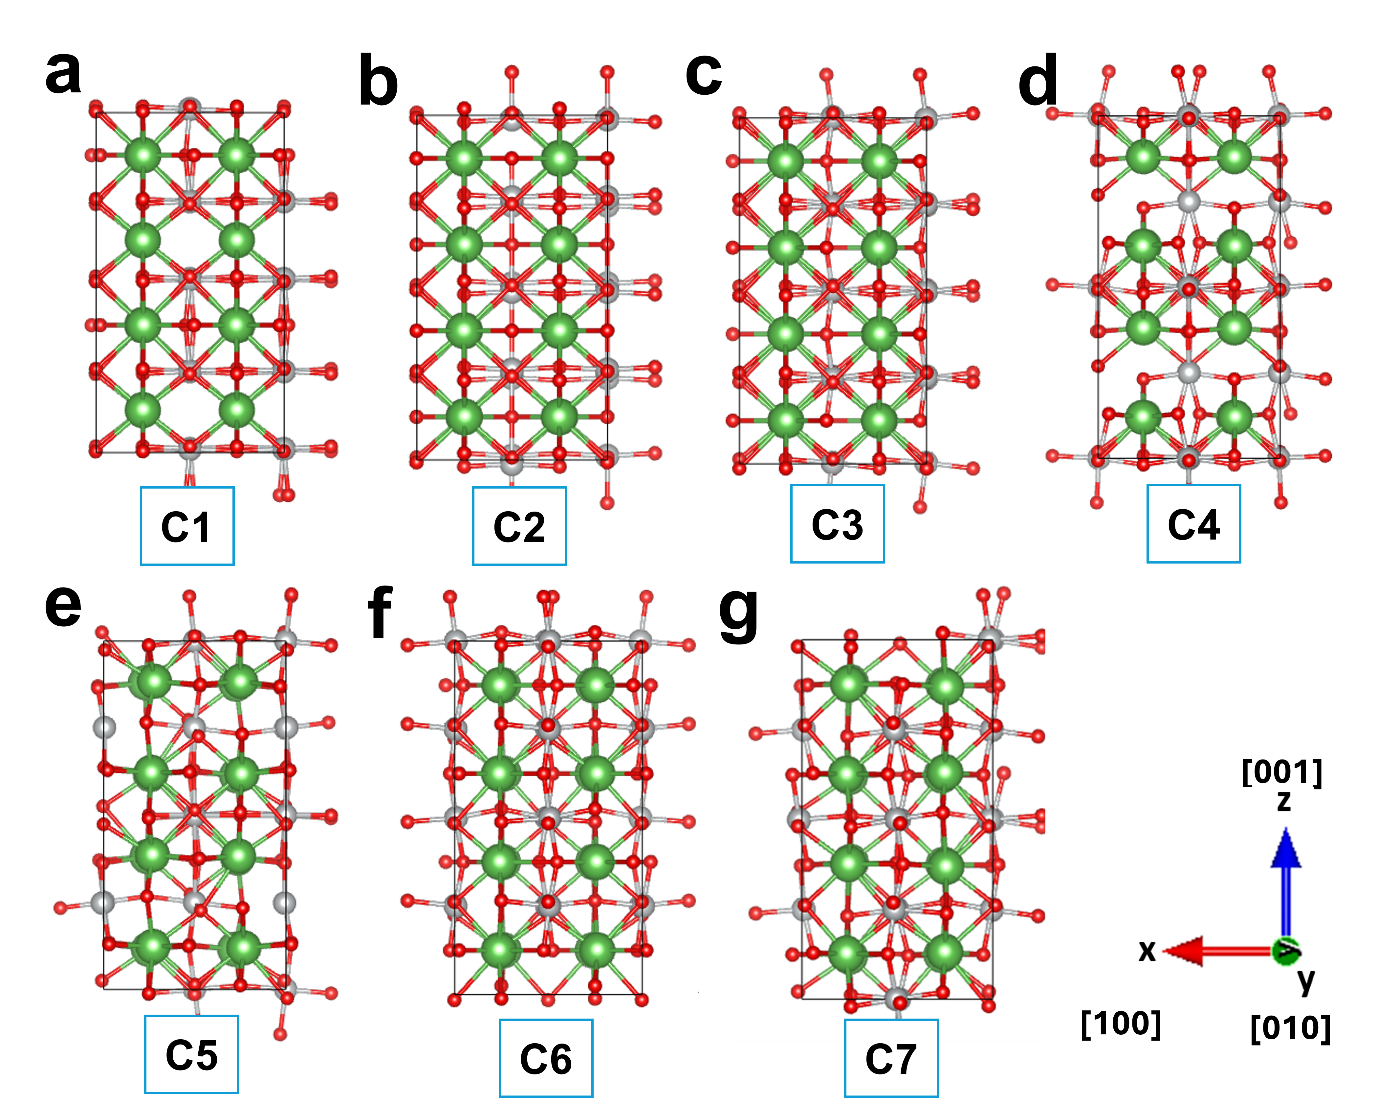


*Fig. S2 (a-g) Unit cell of LaNiO2.5 phases with different ordering of oxygen vacancies, named C1 to C7, respectively. (C1-C3) ordered oxygen vacancies in the La-O layer (C4-C7) in the Ni-O layer, respectively.*


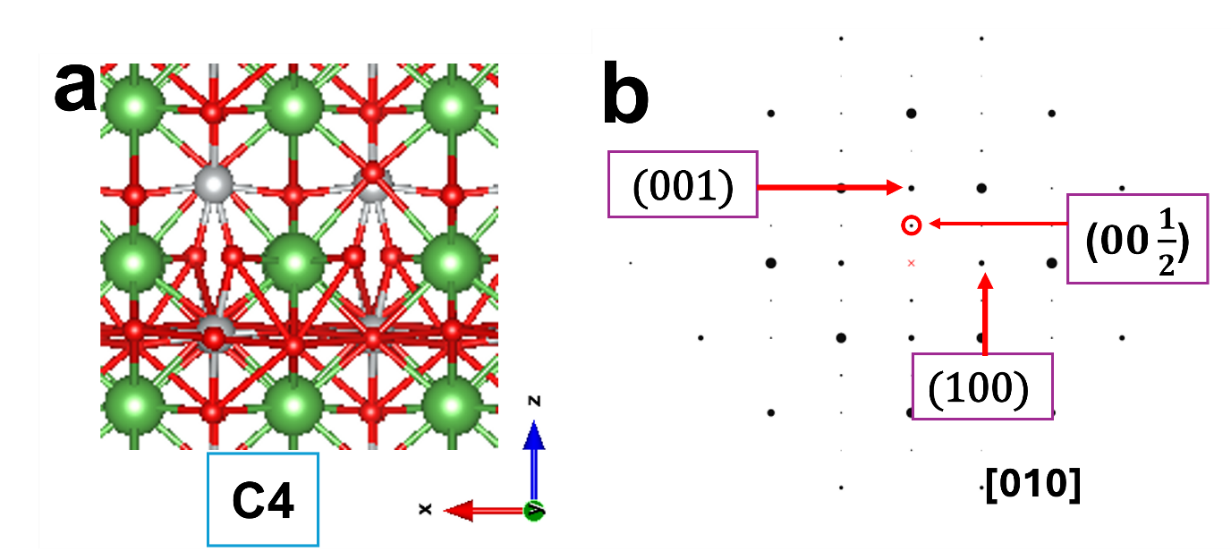


*Fig. S3 (a) LaNiO2.5 structure C4 with oxygen vacancy in Ni-O layer viewed along [010] direction. (b) The simulated diffraction pattern of the C4 structure along the [010] direction shows the superlattice reflection of the (00) plane.*


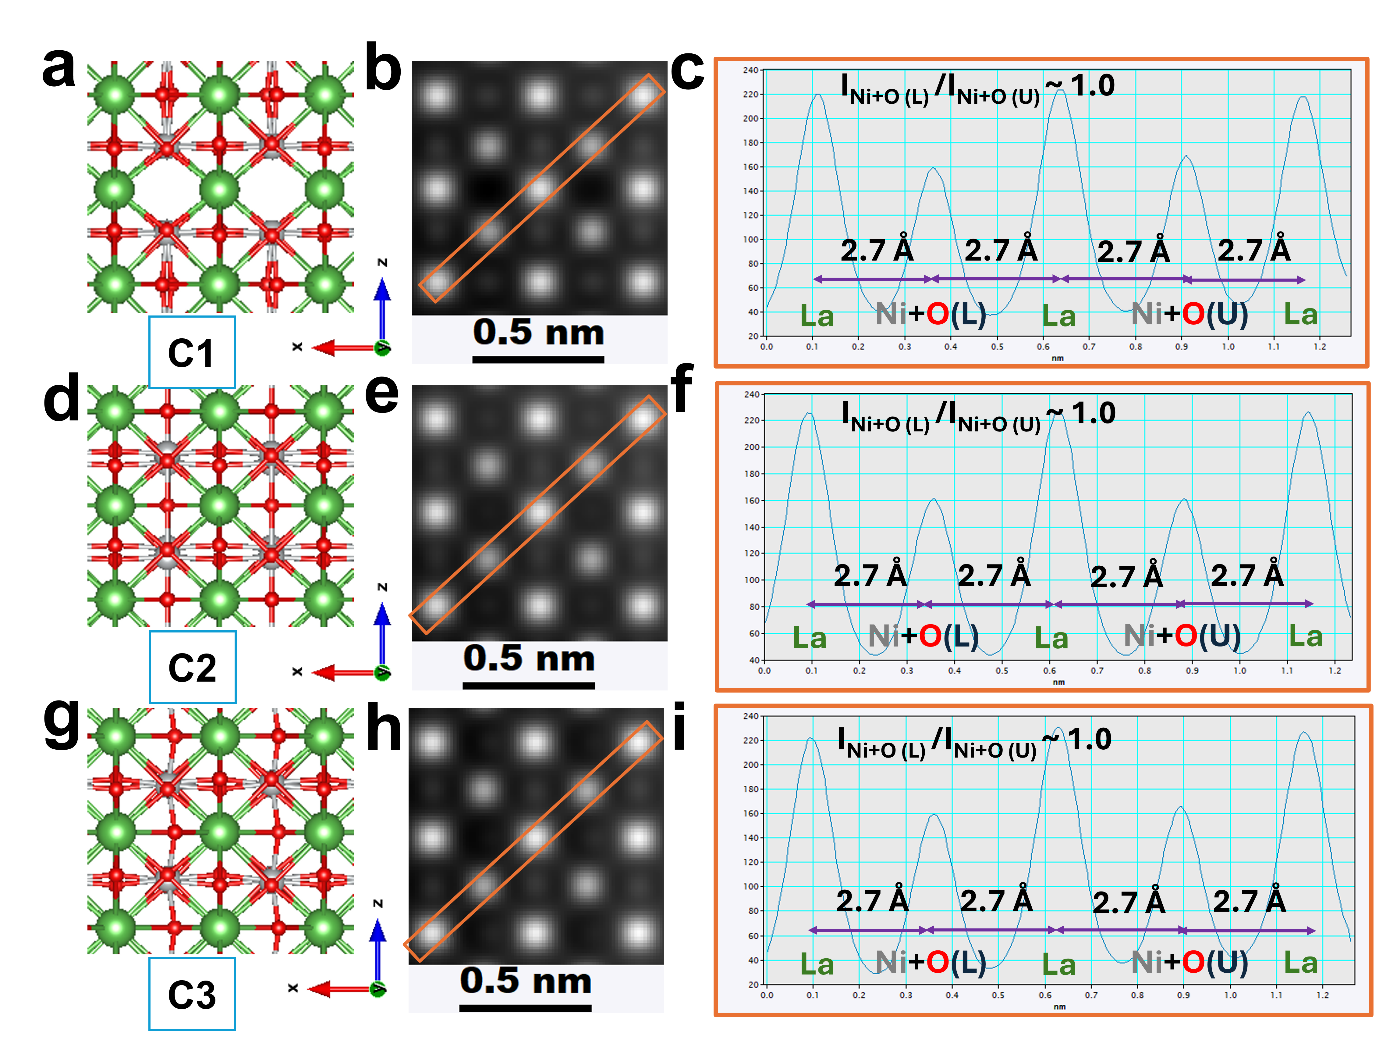


*Fig. S4 (a, d and g) LaNiO2.5 structures (C1-C3) viewed along [010] direction respectively. (b, e, and h) Simulated iDPC-STEM image of C1-C3 structures. (c, f and i) intensity line profiles of La and Ni+O atoms along diagonals marked with orange rectangles in Fig. S3(b, e, and h), respectively.*


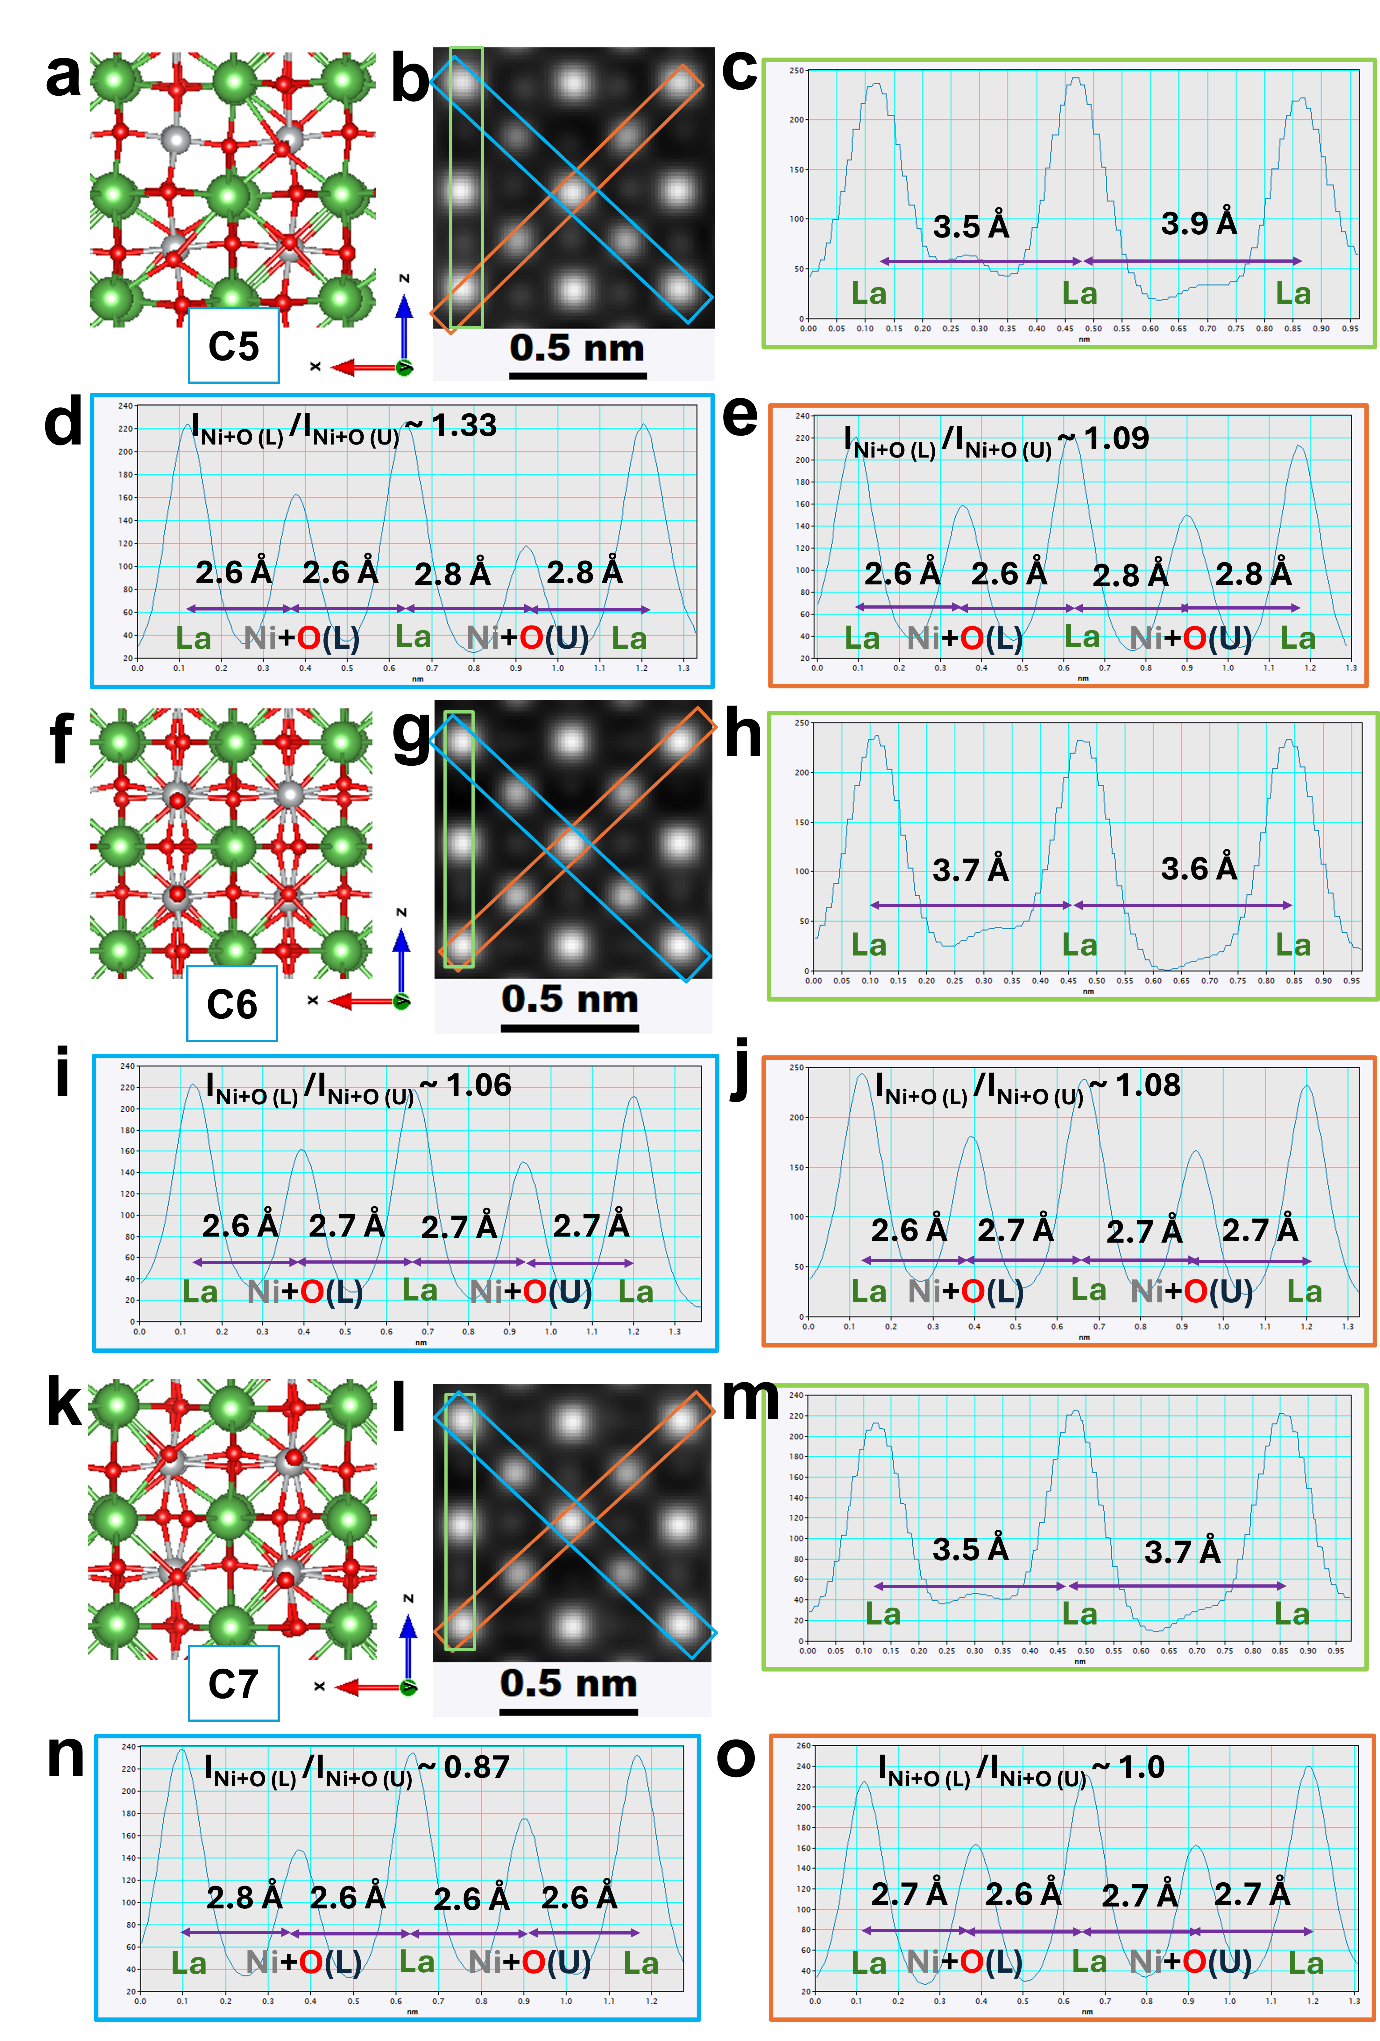


*Fig. S5 (a, f and k) LaNiO2.5 structures (C5-C7) viewed along [010] direction respectively. (b, g and i) simulated iDPC-STEM image of LaNiO2.5 generated from the structures (C5-C7) shown in (a, f, and k); intensity line profiles along the out-of-plane and diagonals are marked with green, orange, and blue rectangles. (c, h and m) Intensity profile of La atoms along the out-of-plane direction, (d, e, i, j, n, and o) intensity profiles of La and Ni+O atoms along diagonals marked with a blue and orange rectangle of structures C5-C7, respectively.*


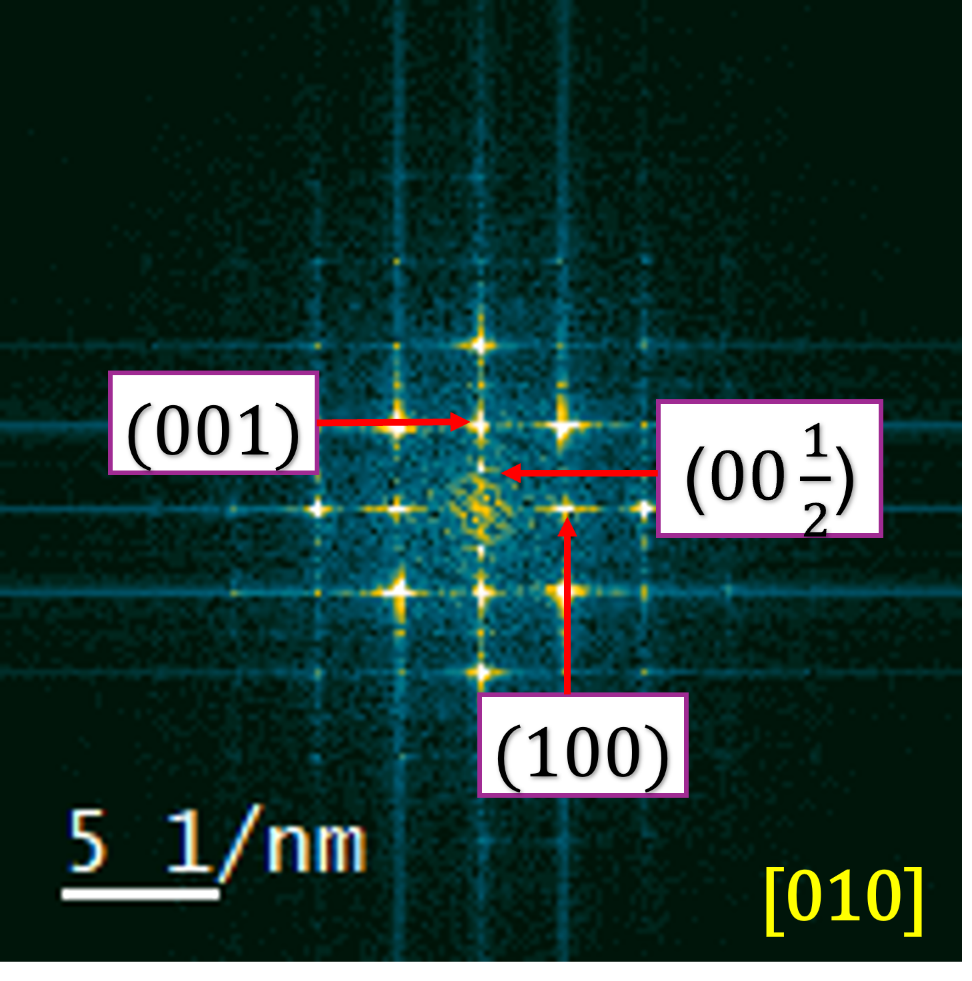


*Fig. S6* *The power spectrum of the iDPC-STEM image of LNO film taken from the purple rectangular region in Fig. 4(c).*

*
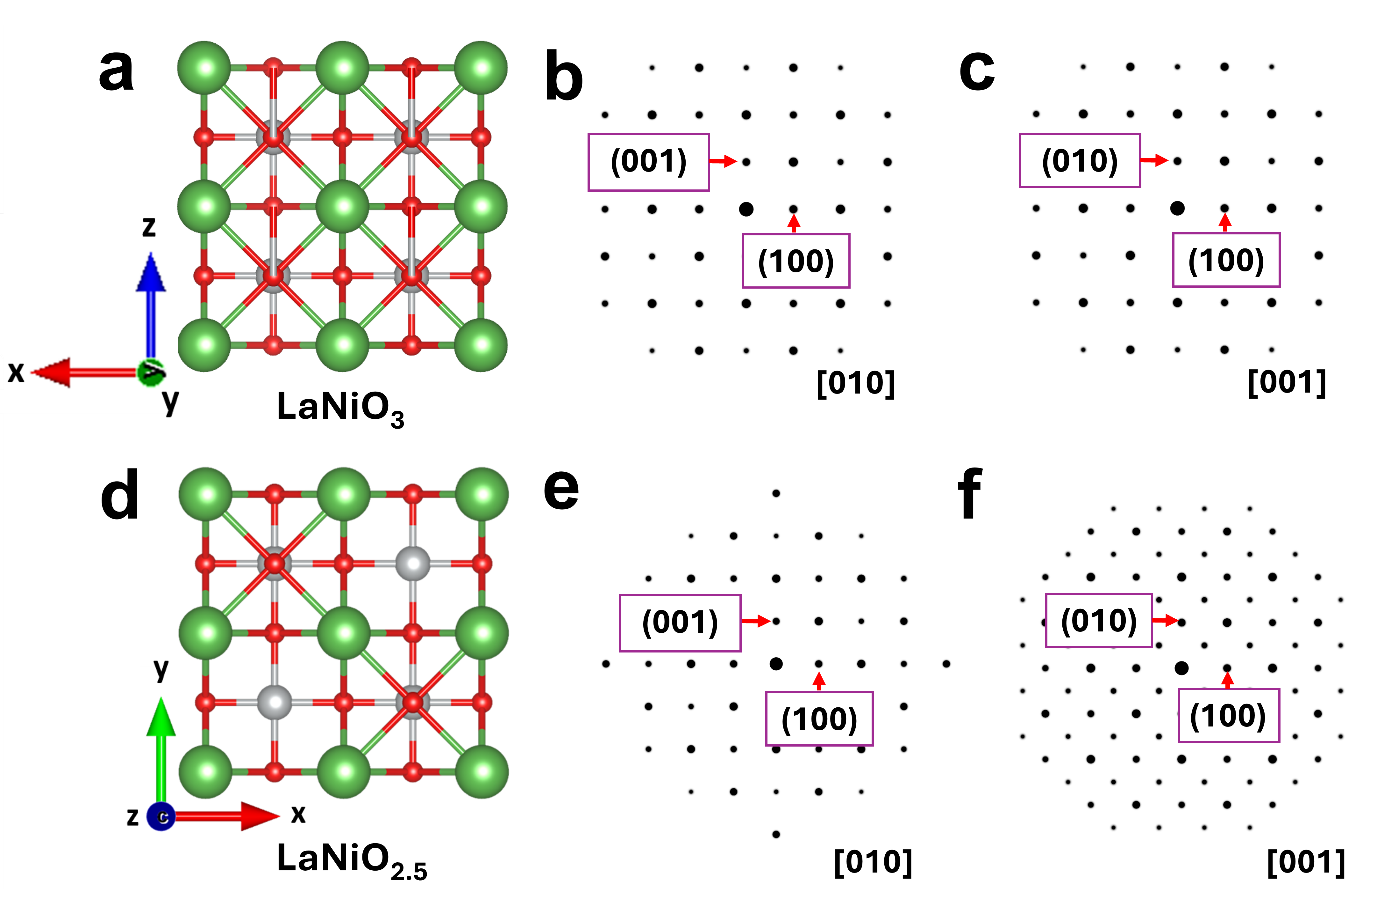
*

*Fig. S7 (a-c) Unit cell and simulated diffraction pattern of LaNiO3 phase along [010] and [001] direction, respectively (d-f) Unit cell and simulated diffraction pattern of LaNiO2.5 phase along [010] and [001] direction, respectively.*
